# Supplementary figures and images for: In Silico Study of Superoxide Dismutase Gene Family in Potato and Effects of Elevated Temperature and Salicylic Acid on Gene Expression
Source: MDPI journal article supplement (doi:10.3390/antiox11030488), 2022-02-28

General

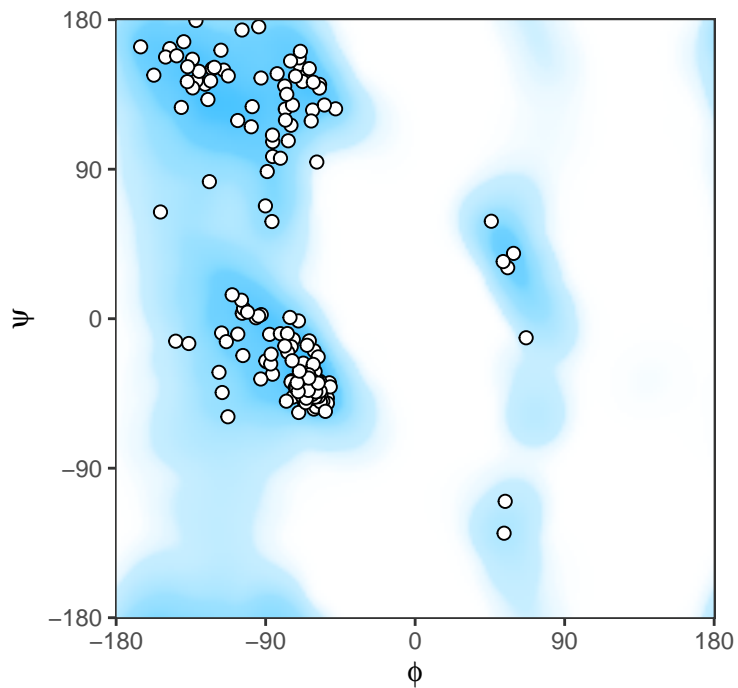

Glycine (Symmetric)

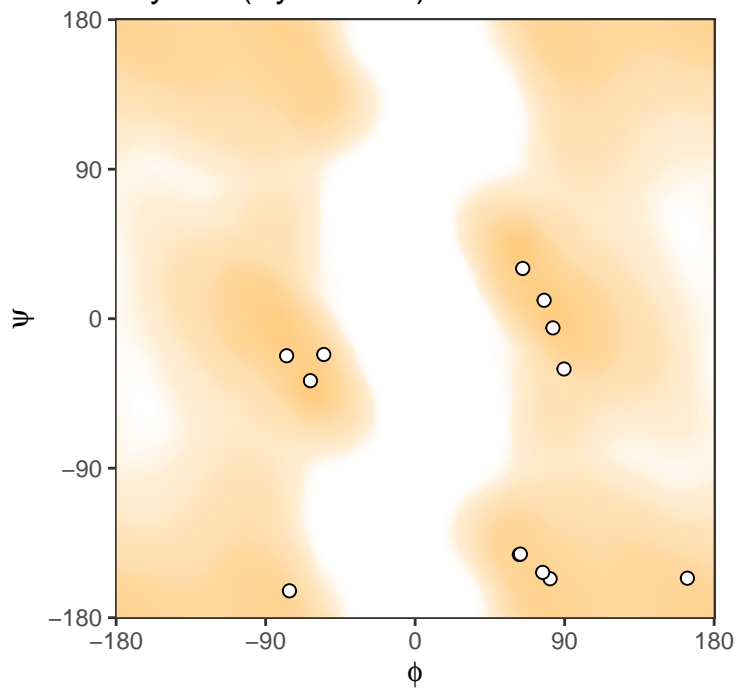

Pre-Proline

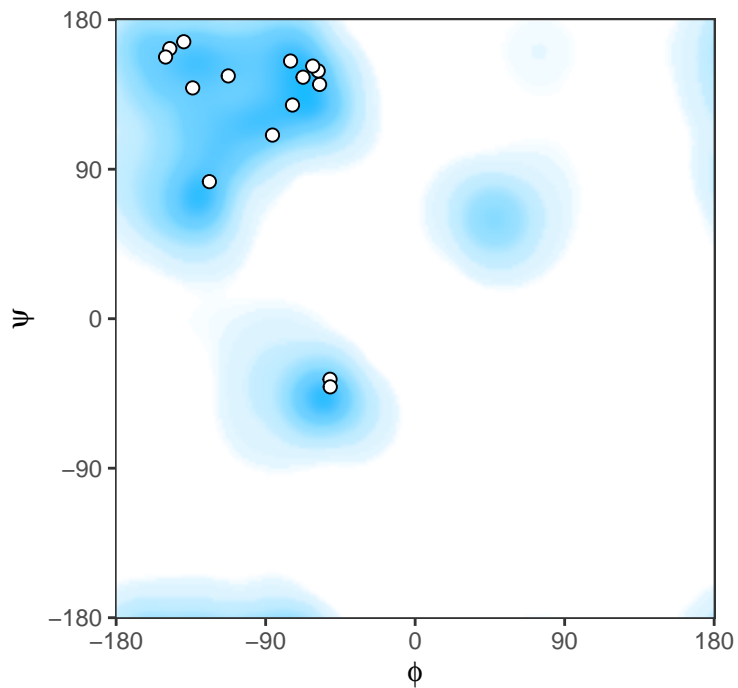

Proline

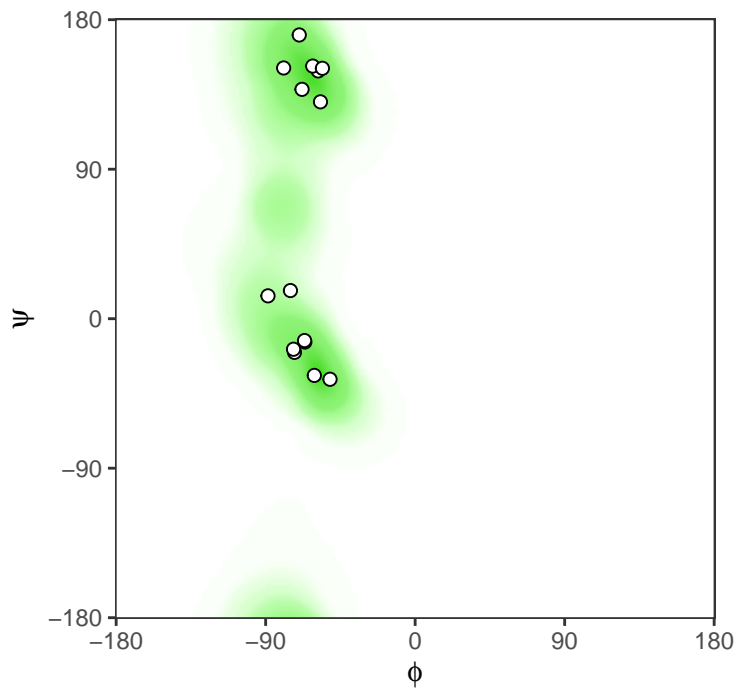

Supplement: s1 [file s1]

General

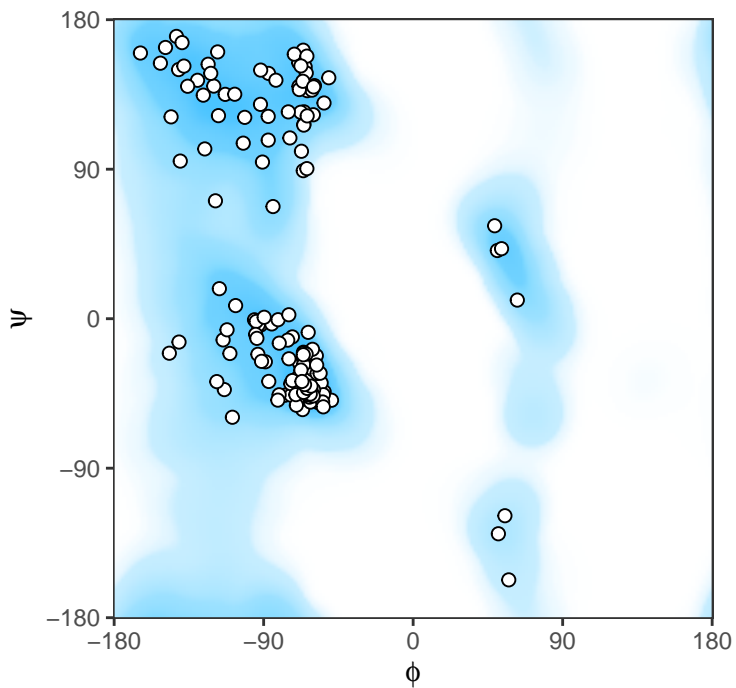

Glycine (Symmetric)

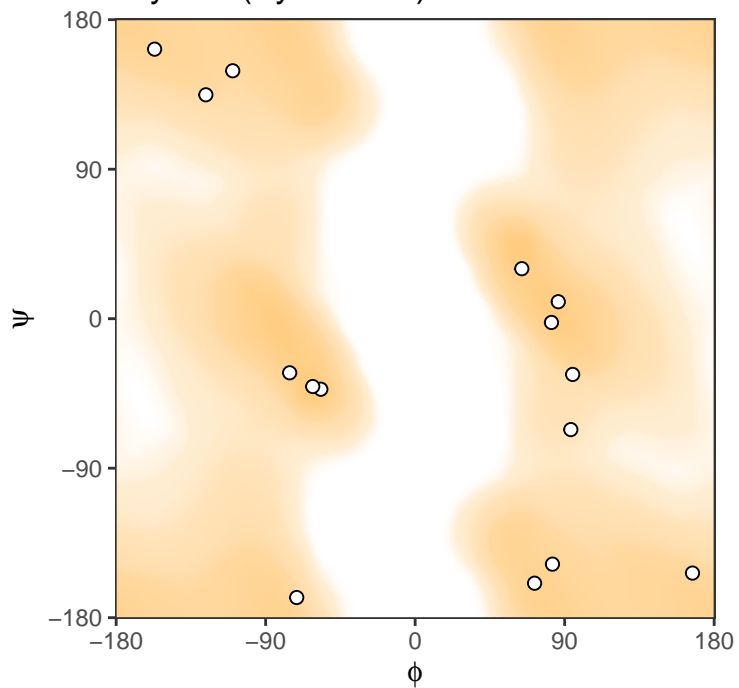

Pre-Proline

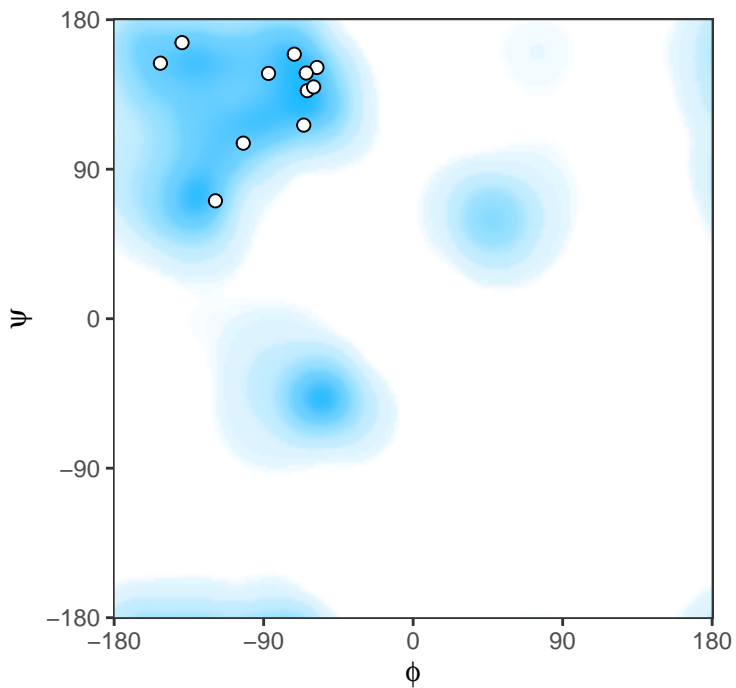

Proline

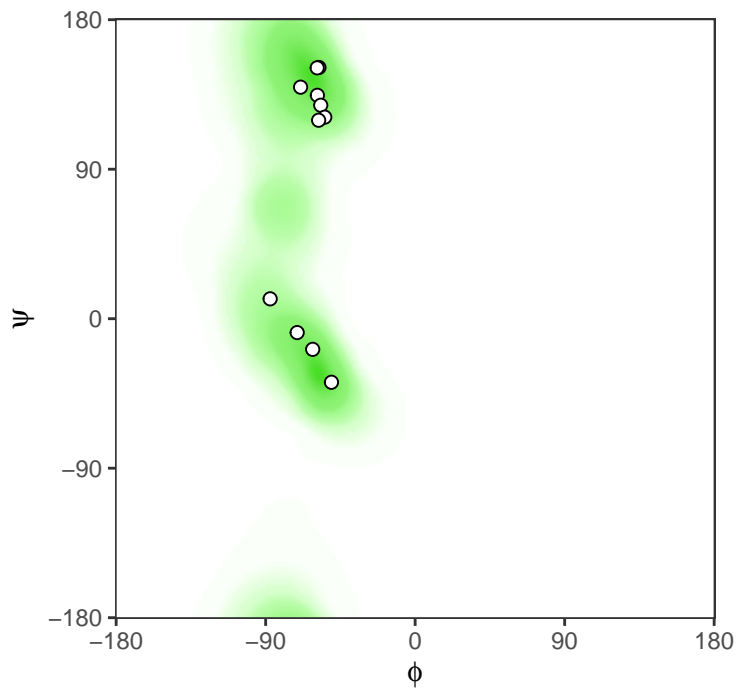

Supplement: s1 [file s1]

General

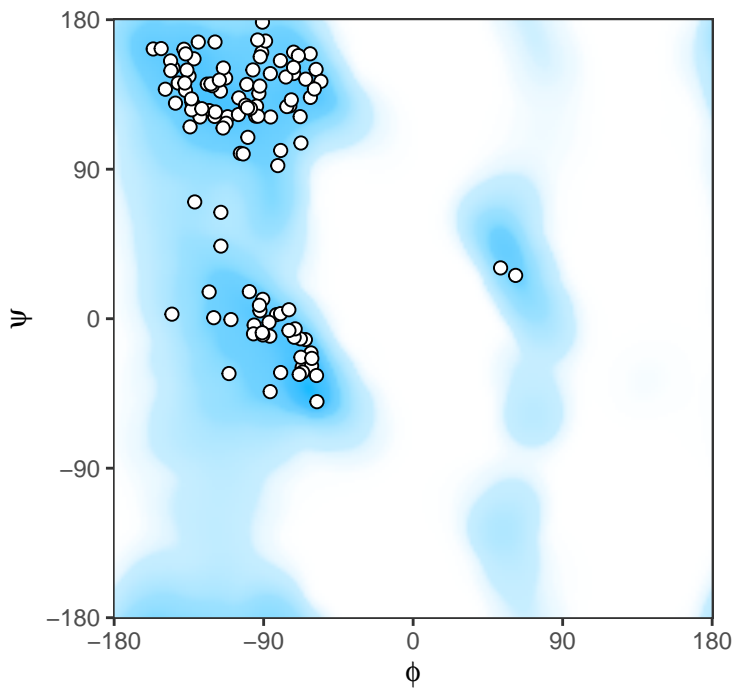

Glycine (Symmetric)

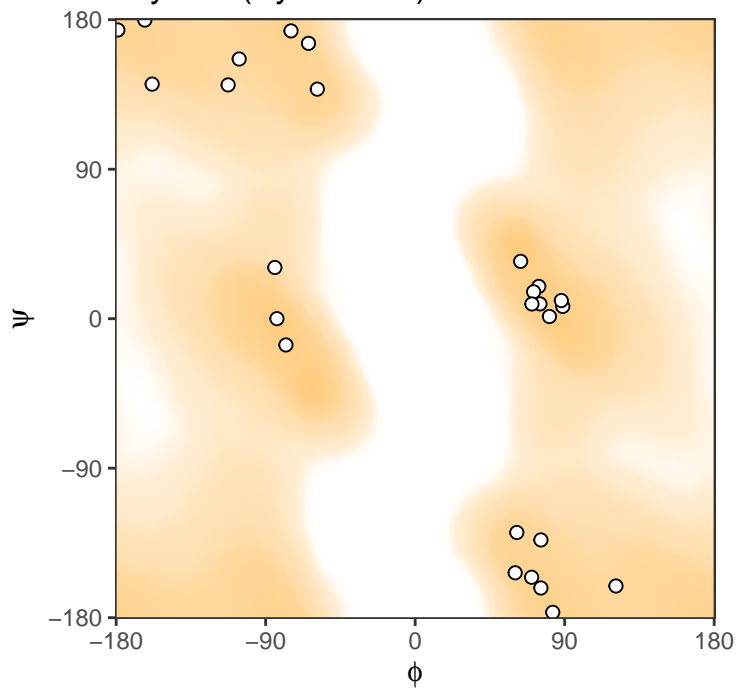

Pre-Proline

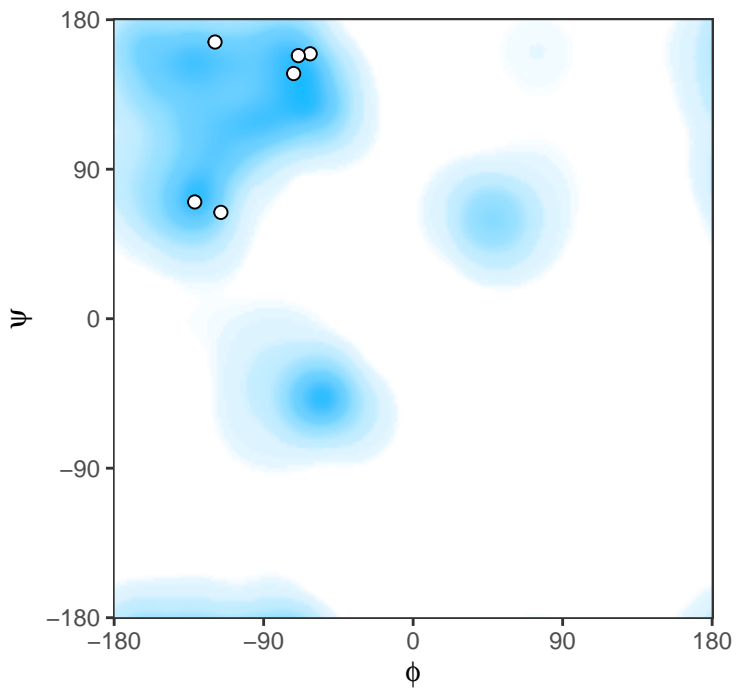

Proline

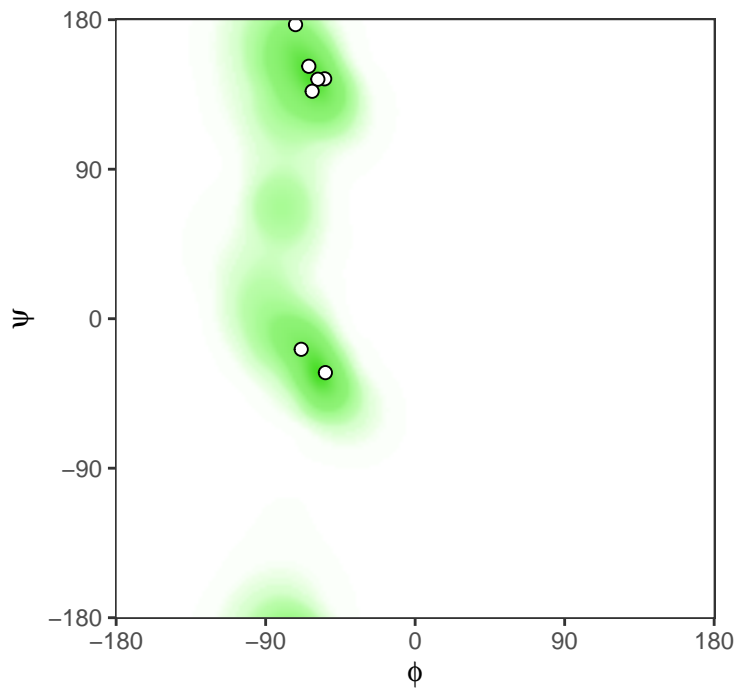

Supplement: s1 [file s1]

General

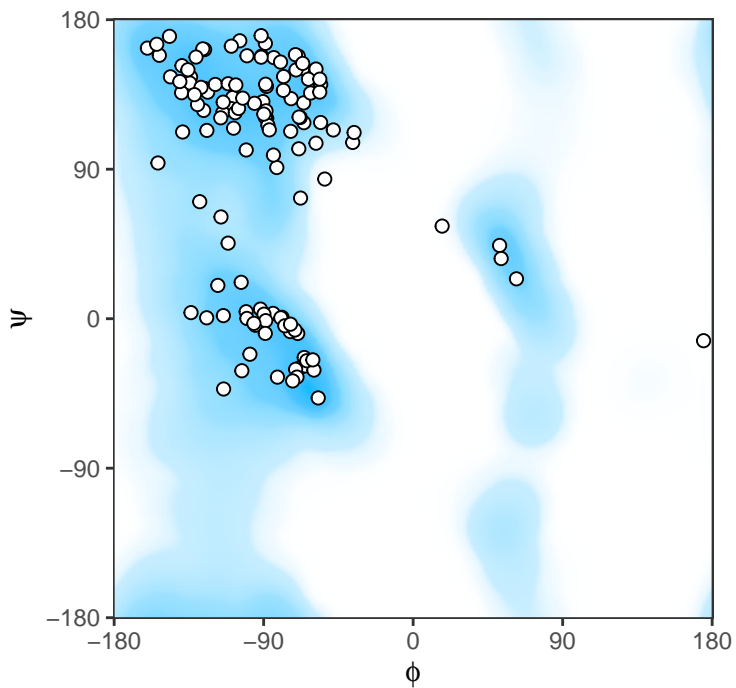

Glycine (Symmetric)

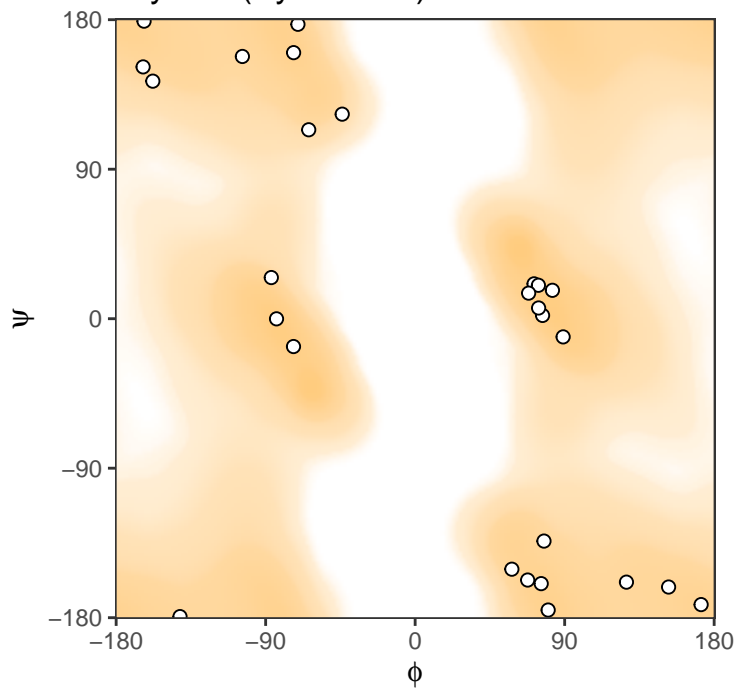

Pre-Proline

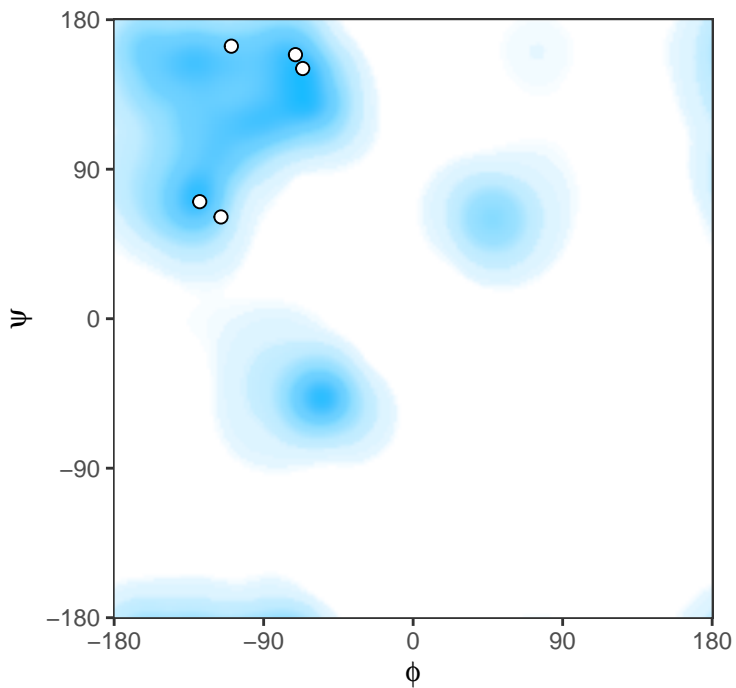

Proline

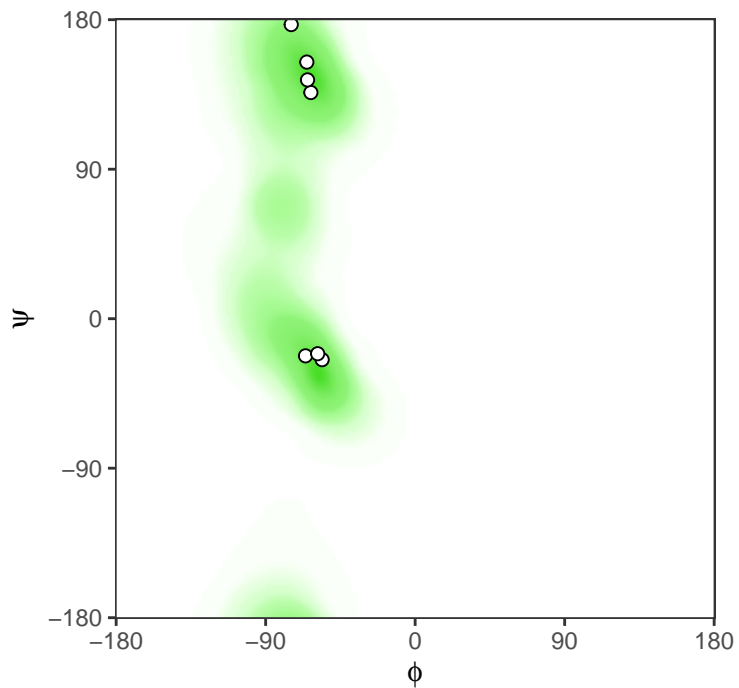

Supplement: s1 [file s1]

General

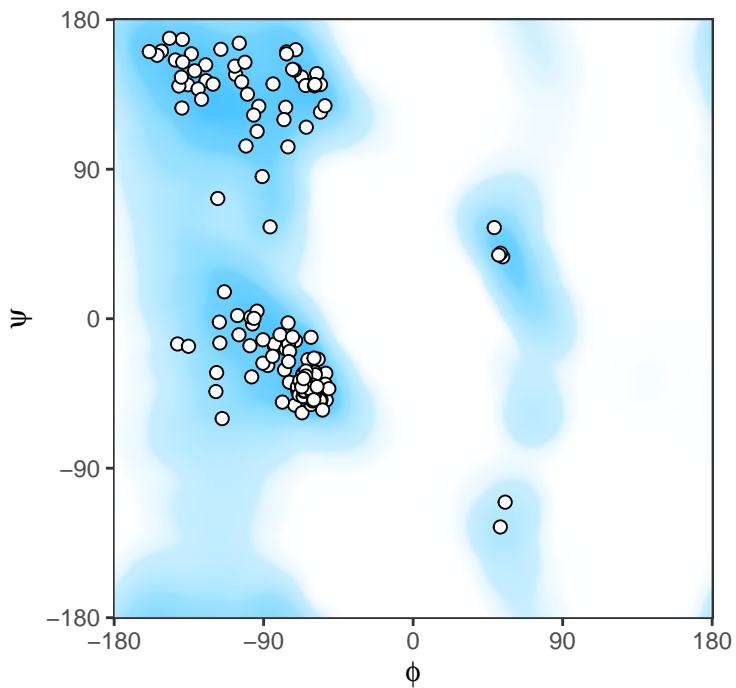

Glycine (Symmetric)

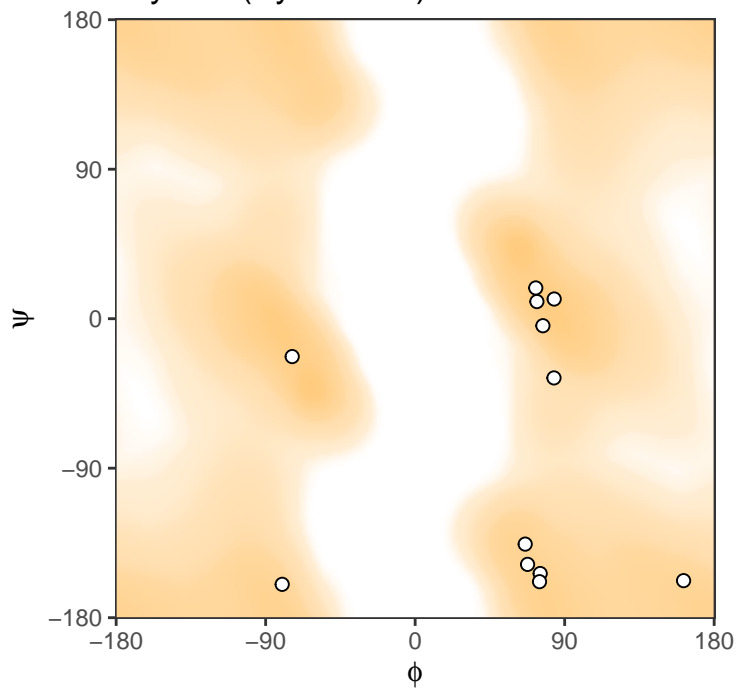

Pre-Proline

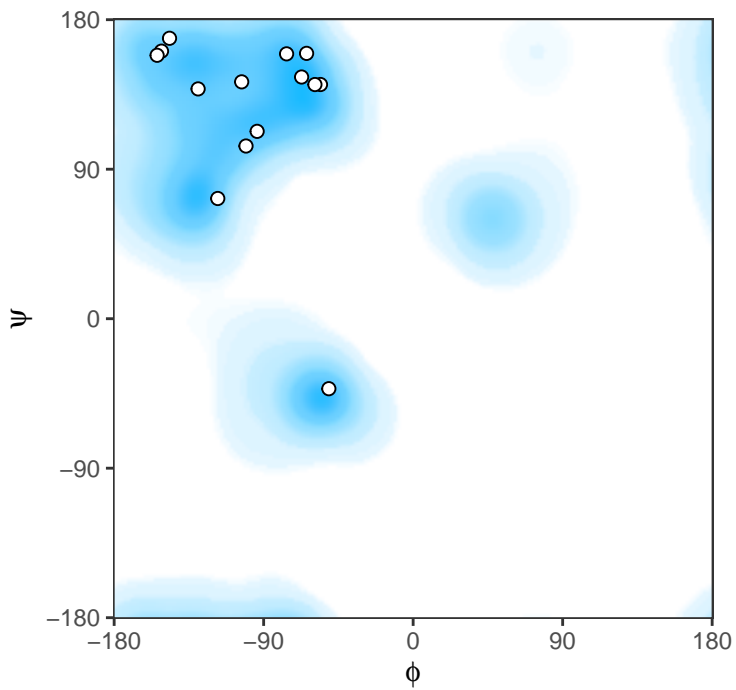

Proline

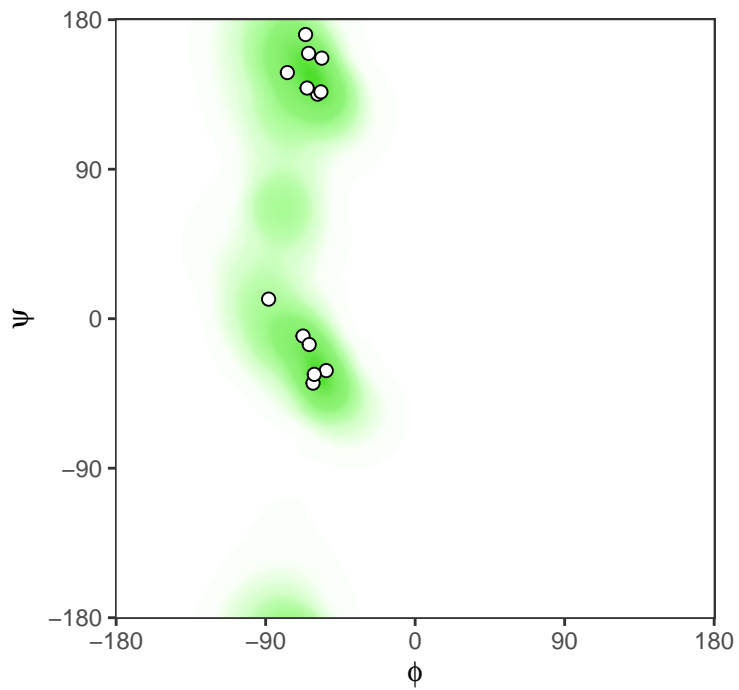

Supplement: s1 [file s1]

B

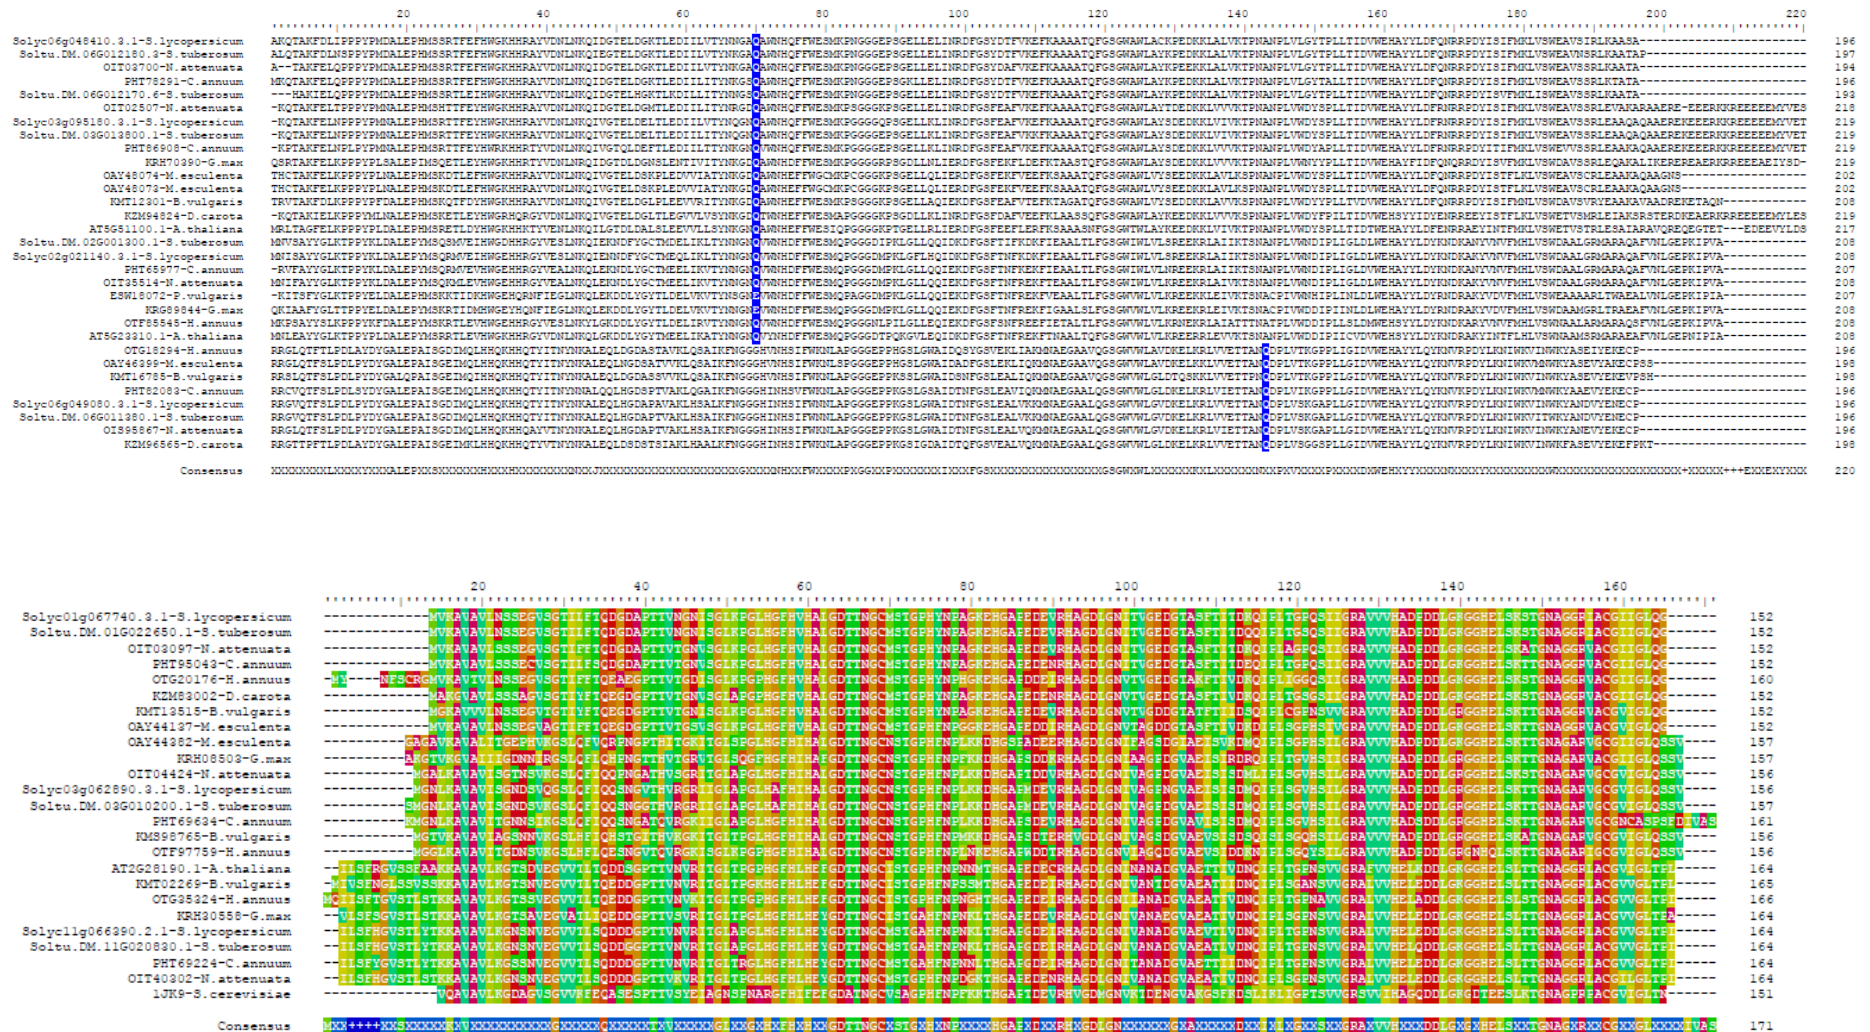

Figure S2. Alignments of Mn-FeSOD (A) and CuZnSOD (B) proteins used for phylogeny reconstruction.

Supplement: s1 [file s1]

General

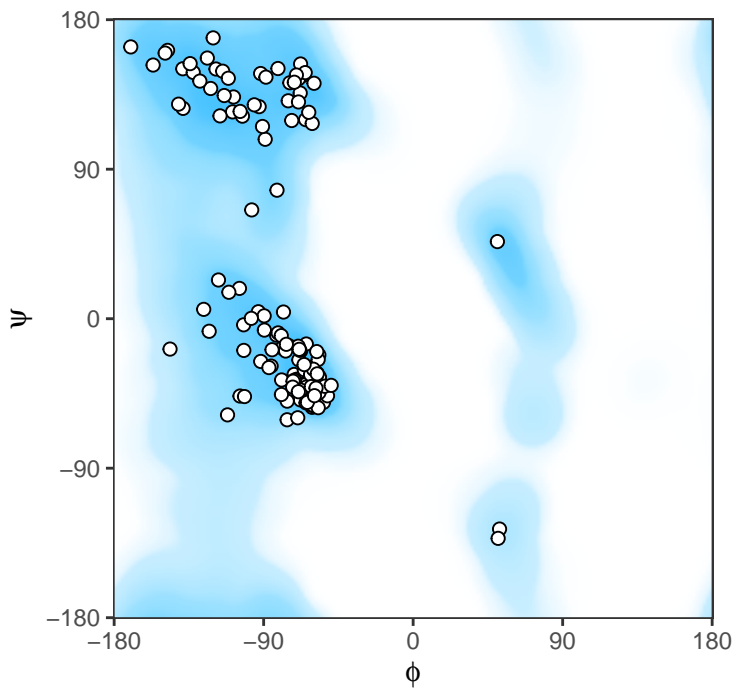

Glycine (Symmetric)

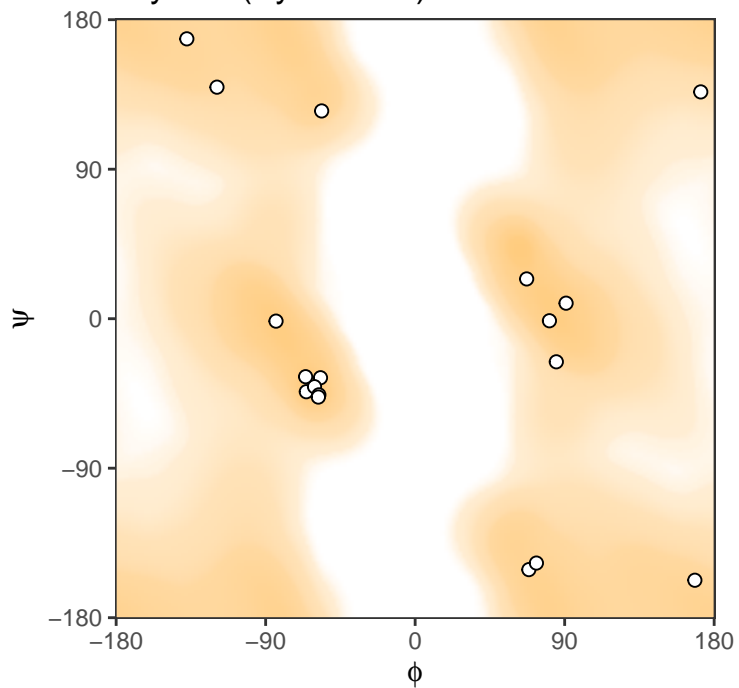

Pre-Proline

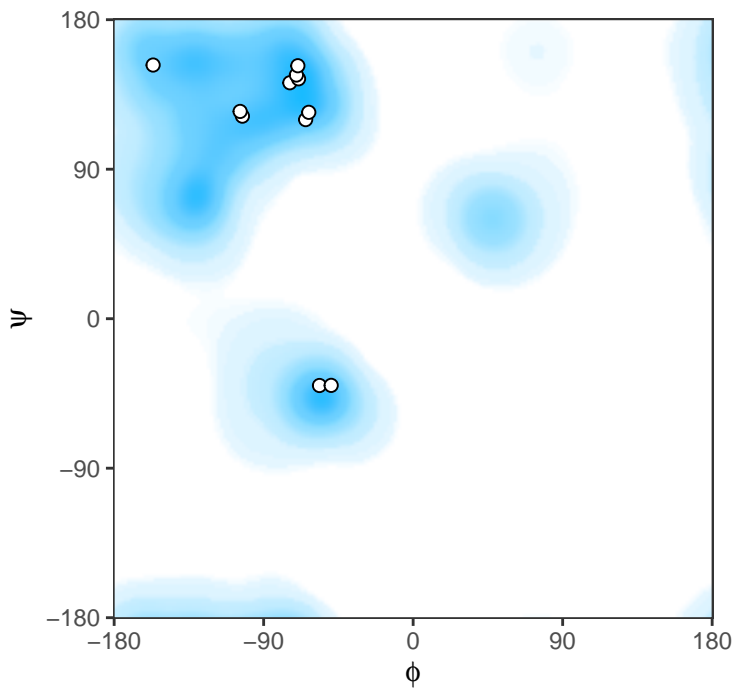

Proline

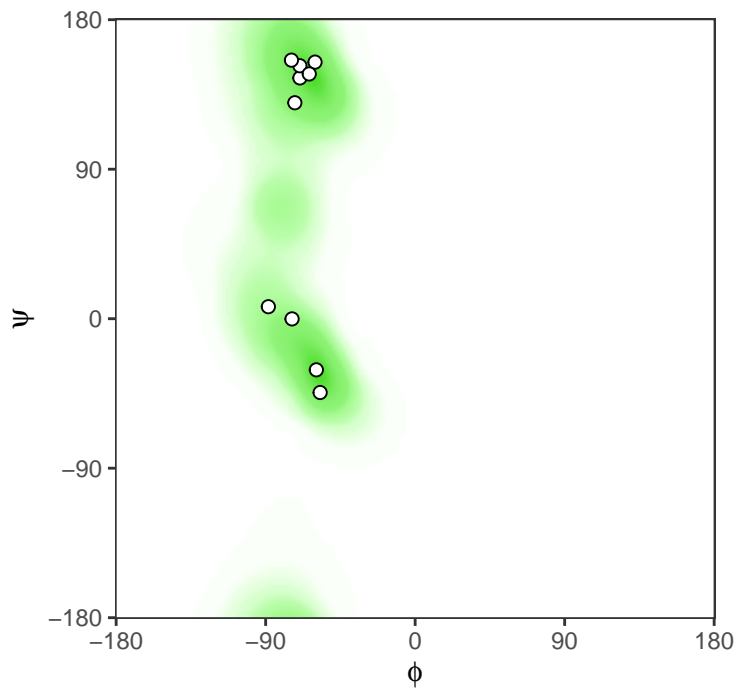

Supplement: s1 [file s1]

General

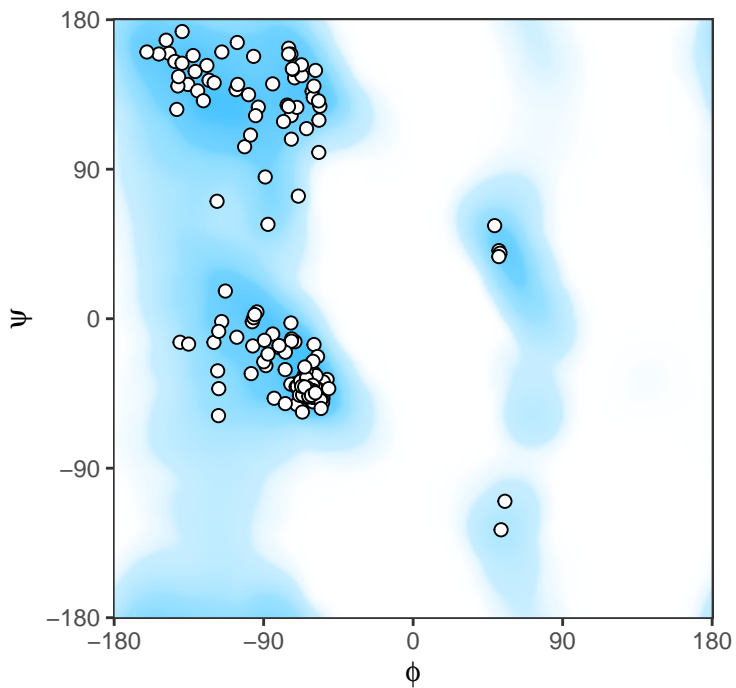

Glycine (Symmetric)

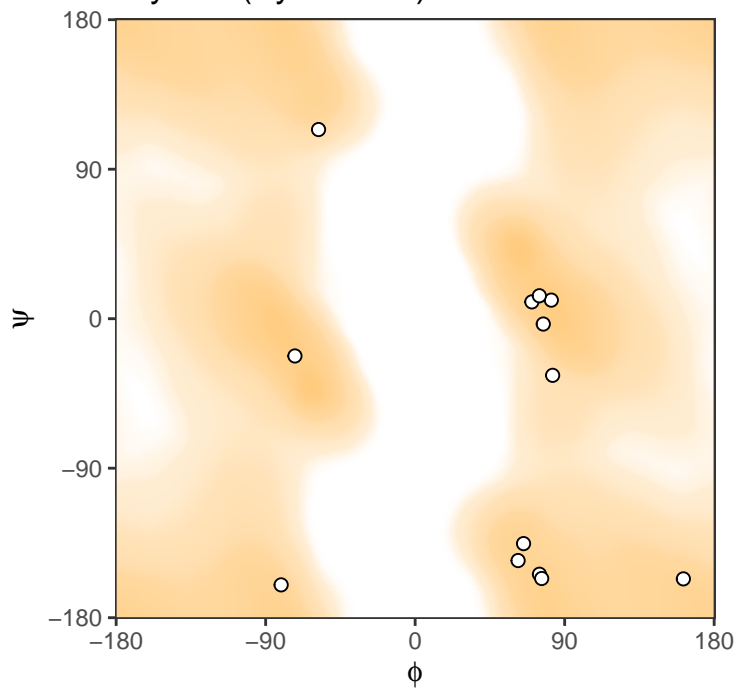

Pre-Proline

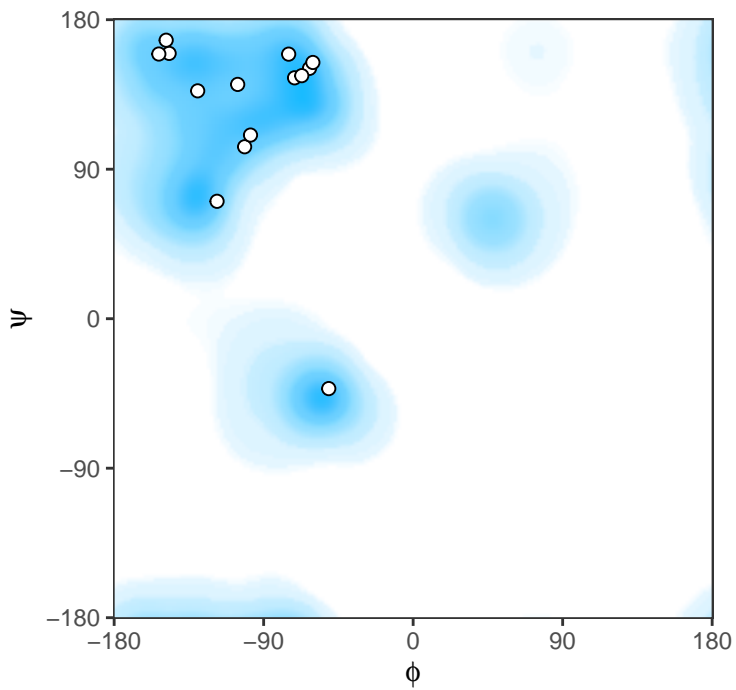

Proline

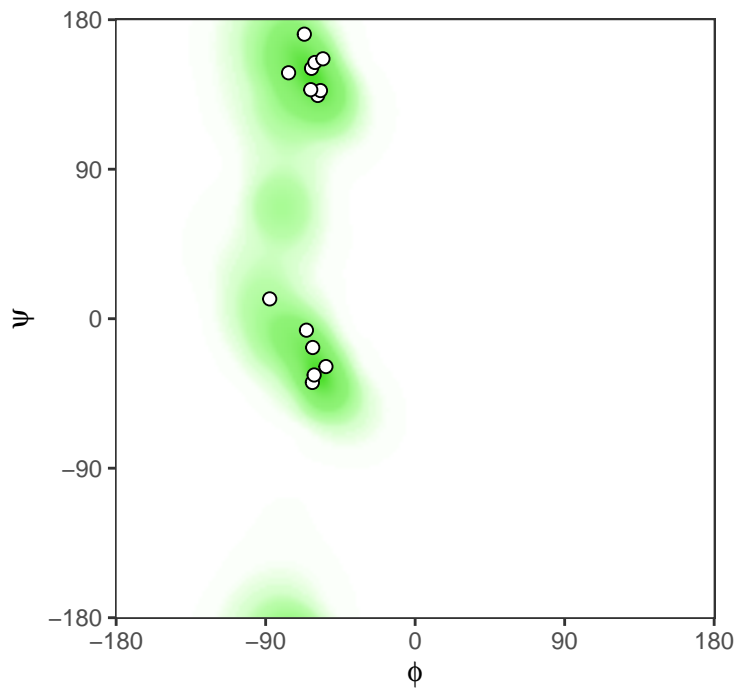

Supplement: s1 [file s1]

General

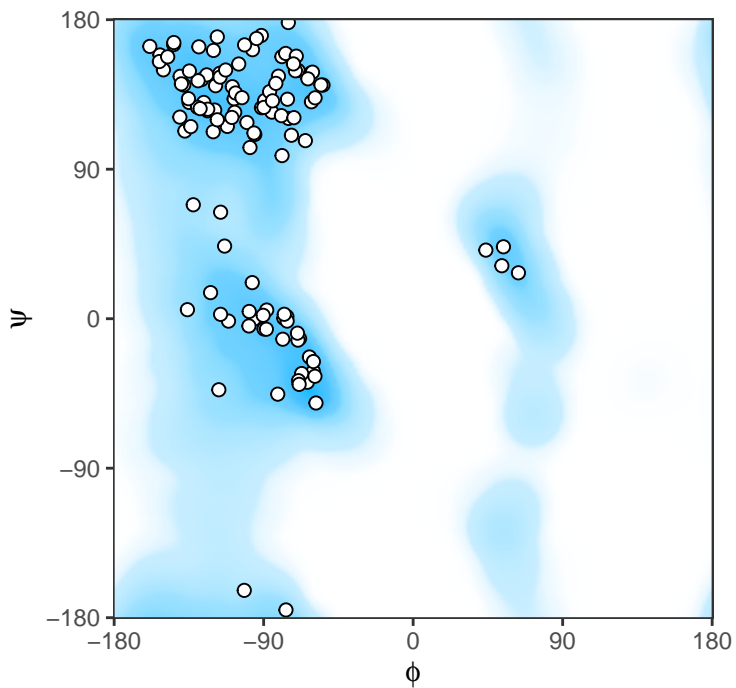

Glycine (Symmetric)

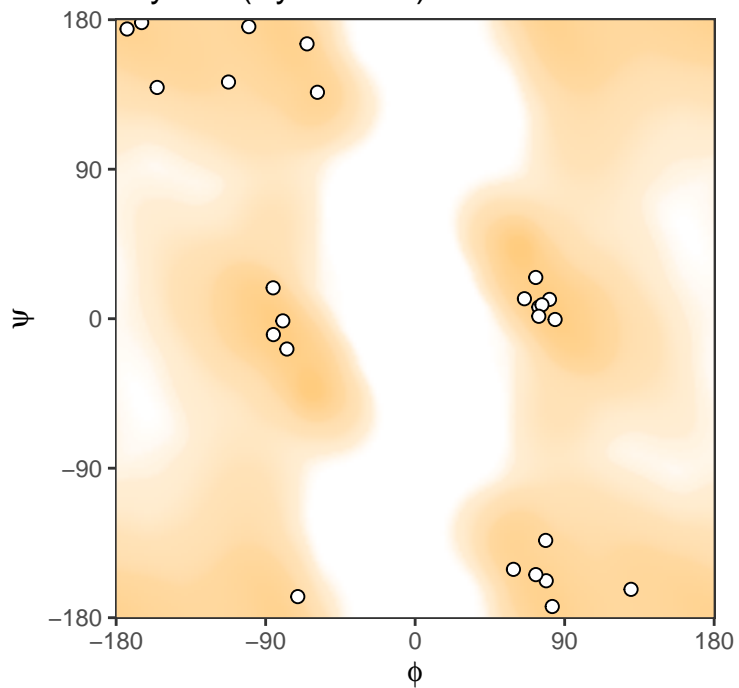

Pre-Proline

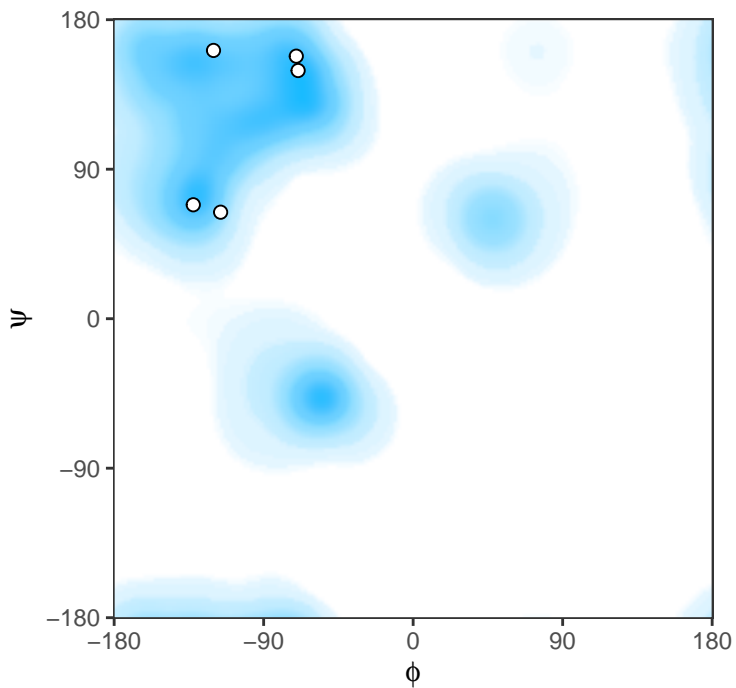

Proline

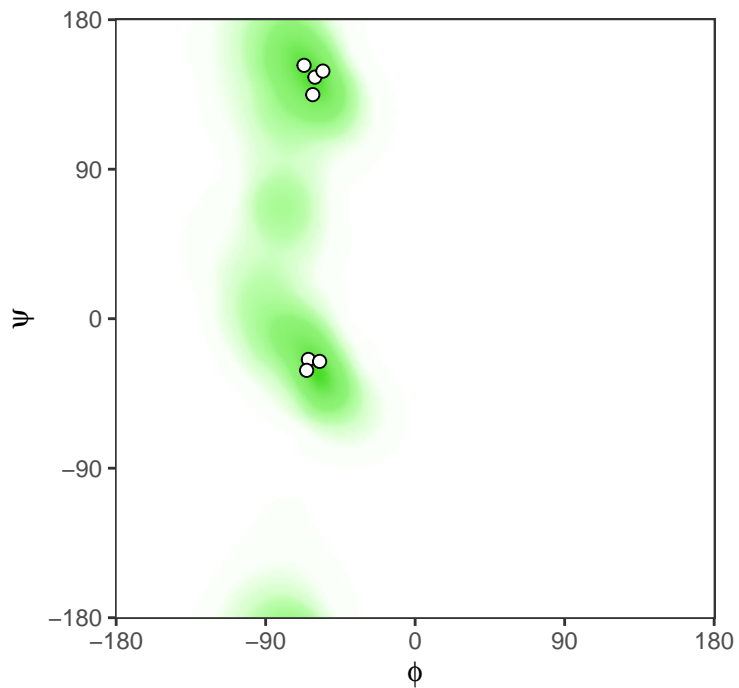

Supplement: s1 [file s1]
